# Supplementary material
Source: Springer Nature journal article supplement (https://www.springermedizin.de/resource/supplementary/12872_2013_681_MOESM5_ESM.pdf/9430654)
Supplement: MOESM5 [file 9430654]

**Duration of ICU stay**

10 Days or more

7

9 Days

4

8 Days

4

7 Days

1

6 Days

7

5 Days

6

4 Days

16

3 Days

11

2 Days

11

1 Day

2

**Number of patients**

Mean: 6.9 days

Median: 4 days

Range: 0 – 154 days

IQR: 2-6 days

*A total 69 patients  
required ICU care*
